# Supplementary material
Source: ML conference proceedings conference paper supplement (https://openreview.net/forum?id=L0D0cnKaP0)

C=2

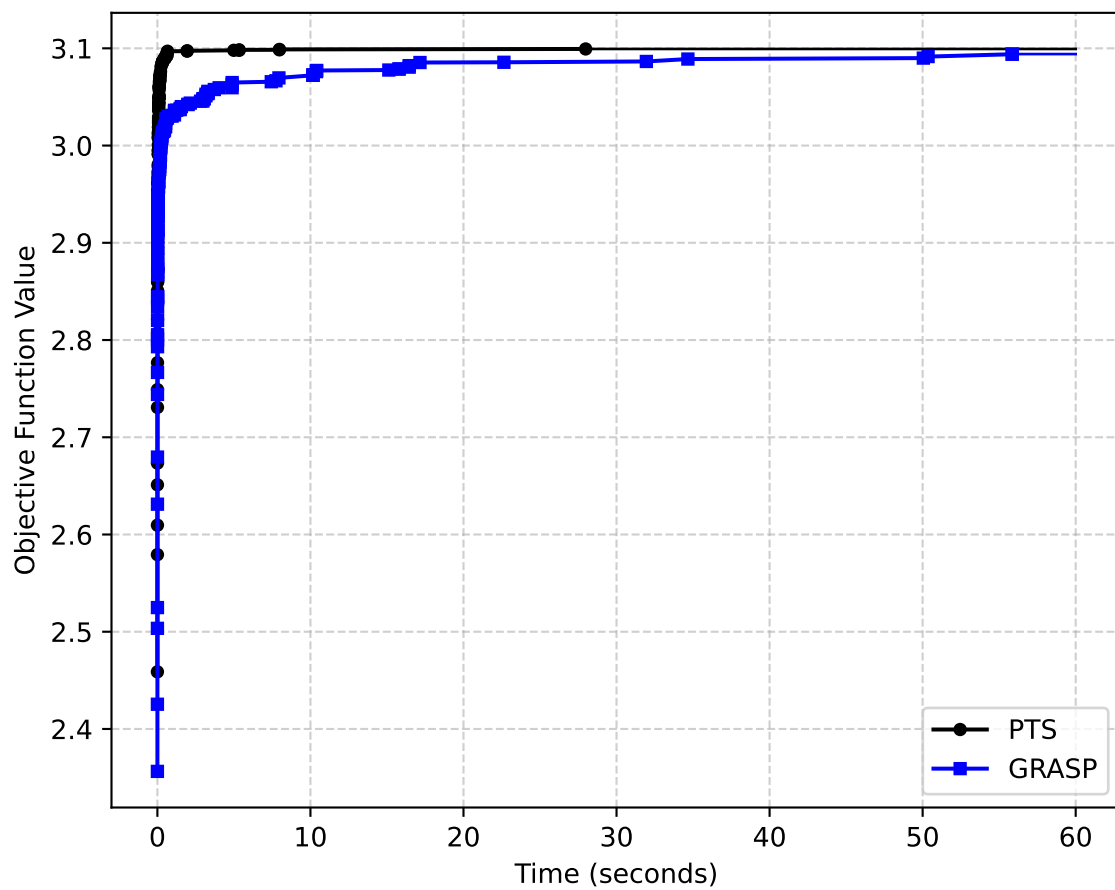

C=4

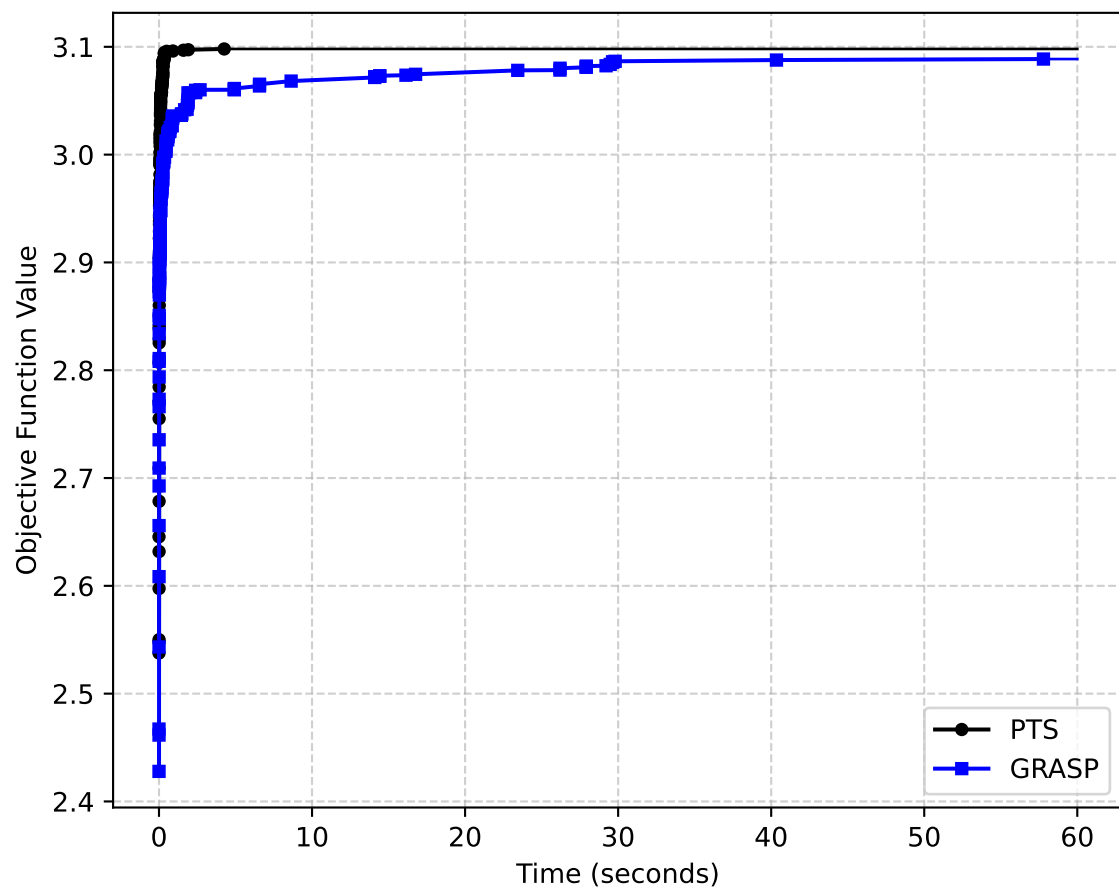

C=6

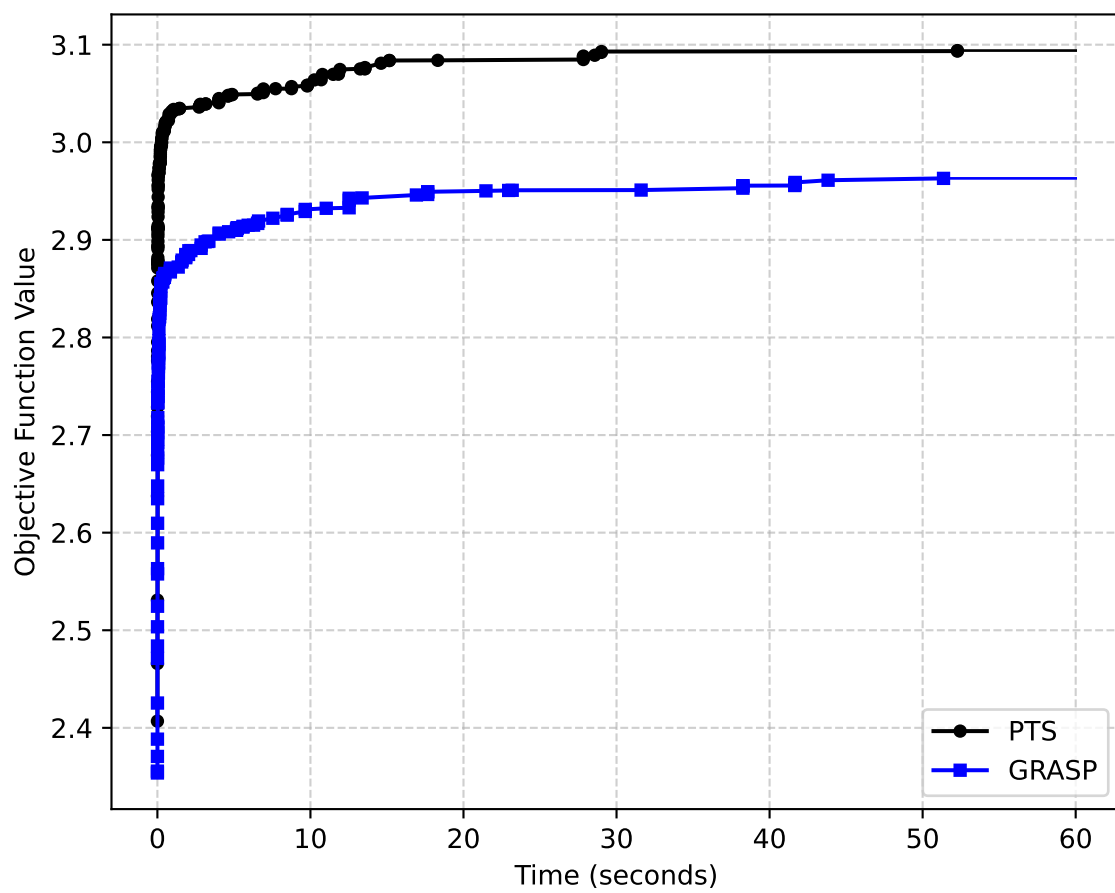

C=8

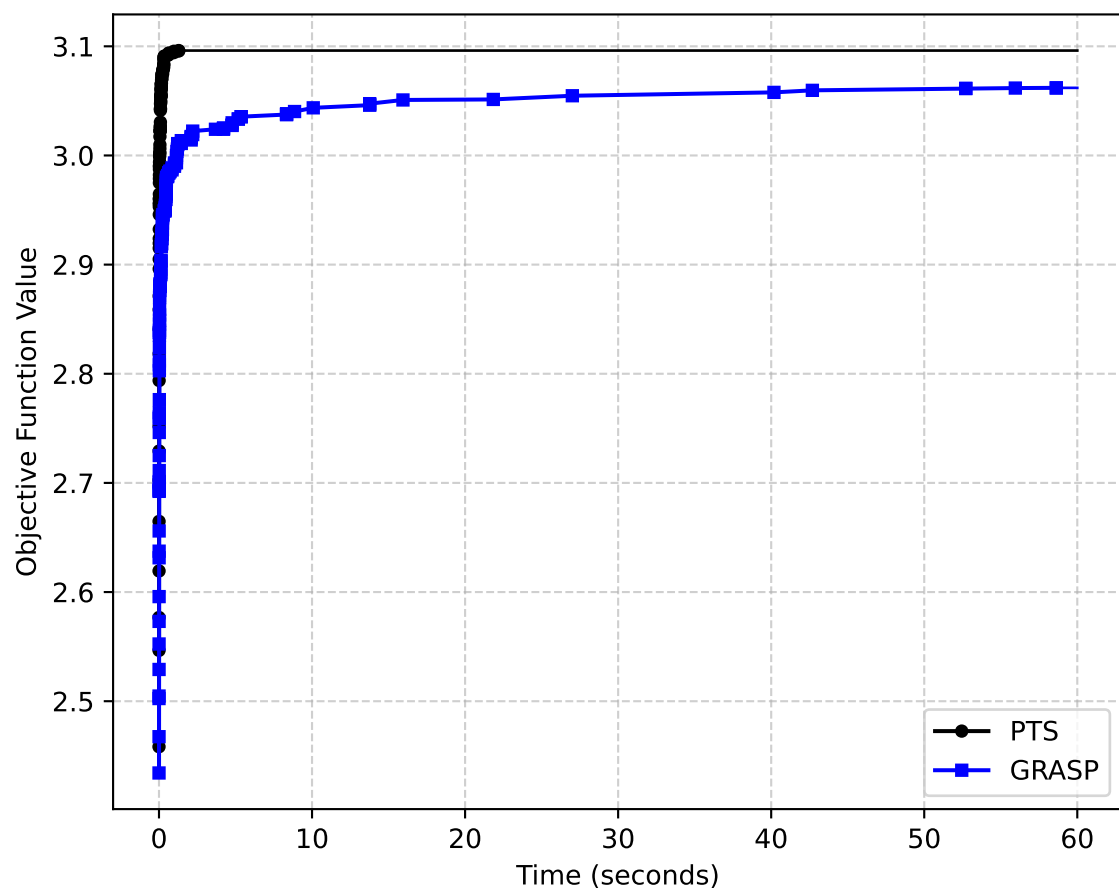

Supplement: supplementary_material [file attachment]
